# Supplementary material
Source: PubMed Central journal article supplement (PMC5544071)
Supplement: tpmd160611.SD1.pdf [file tpmd160611.SD1.pdf]

SUPPLEMENTAL TABLE 1

Table showing effect sizes of other variables tested in a logistic regression models for association with IGRA results

|                                                     | IGRA positive result (N = 718) |             |           |         |             |            |         |
|-----------------------------------------------------|--------------------------------|-------------|-----------|---------|-------------|------------|---------|
|                                                     | n (%)                          | Odds ratio* | 95% CI    | P value | Odds ratio† | 95% CI     | P value |
| BCG vaccination status (N = 643)                    |                                |             |           |         |             |            |         |
| Scar absent                                         | 313 (48.7)                     | 1           |           |         |             |            |         |
| Scar present                                        | 330 (51.3)                     | 0.93        | 0.73–1.18 | 0.545   | 0.94        | 0.67–1.34  | 0.743   |
| Exposed to other smoking contact                    |                                |             |           |         |             |            |         |
| No                                                  | 428 (59.6)                     | 1           |           |         |             |            |         |
| Yes                                                 | 290 (40.4)                     | 0.86        | 0.56–1.30 | 0.479   | 1.12        | 0.71–1.77  | 0.624   |
| Frequency of smoking in case                        |                                |             |           |         |             |            |         |
| Nonsmoking                                          | 460 (64.1)                     | 1           |           |         | 1           |            |         |
| Light smoking                                       | 106 (14.8)                     | 0.62        | 0.33–1.16 | 0.133   | 0.49        | 0.24–1.00  | 0.051   |
| Heavy smoking                                       | 152 (21.2)                     | 0.88        | 0.53–1.48 | 0.635   | 0.81        | 0.46–1.42  | 0.460   |
| Smear grade of index case                           |                                |             |           |         |             |            |         |
| 1+                                                  | 30 (4.2)                       | 1           |           |         |             |            |         |
| 2++                                                 | 188 (26.2)                     | 1.29        | 0.44–3.73 | 0.640   | 1.16        | 0.30–4.53  | 0.795   |
| 3+++                                                | 500 (69.6)                     | 1.34        | 0.49–3.64 | 0.564   | 0.85        | 0.24–3.06  | 0.762   |
| Radiographic findings in case                       |                                |             |           |         |             |            |         |
| Normal                                              | 45 (2.6)                       | 1           |           |         | 1           |            |         |
| Minimal disease                                     | 597 (34.2)                     | 2.28        | 0.65–7.97 | 0.196   | 3.34        | 0.38–29.36 | 0.152   |
| Moderately advanced                                 | 879 (50.4)                     | 2.67        | 0.78–9.15 | 0.119   | 4.98        | 0.58–42.75 | 0.050   |
| Far advanced                                        | 224 (12.8)                     | 3.38        | 0.92–12.4 | 0.066   | 6.34        | 0.68–59.47 | 0.031   |
| <i>Mycobacterium tuberculosis</i> lineage (N = 666) |                                |             |           |         |             |            |         |
| <i>Mycobacterium africanum</i>                      | 260 (39.0)                     | 1           |           |         | 1           |            |         |
| <i>M. tuberculosis</i>                              | 406 (61.0)                     | 1.55        | 0.99–2.45 | 0.056   | 1.40        | 0.89–2.20  | 0.147   |

CI = confidence interval; IGRA = interferon gamma release assay; TB = tuberculosis.

\* Univariate regression models, unadjusted.

† Multivariable regression models including interaction terms (##) and adjusted for clustering by household and confounders—age, gender, sleeping proximity, smoking status of other household contacts, BCG scar, sputum smear grade, *Mycobacterium tuberculosis* lineage, and severity of chest radiograph findings in tuberculosis case. Only significant results are shown.
